# Supplementary material for: The SUN protein UNC-84 is required only in force-bearing cells to maintain nuclear envelope architecture
Source: PubMed Central journal article supplement — J Cell Biol. 2014 Jul 21;206(2):163–72. doi: 10.1083/jcb.201405081 (PMC4107780; doi:10.1083/jcb.201405081), 2014-07-21
Supplement: supp_jcb.201405081_JCB_201405081_sm.pdf [file supp_jcb.201405081_JCB_201405081_sm.pdf]

Cain et al., <http://www.jcb.org/cgi/content/full/jcb.201405081/DC1>Table S1. **Strains generated in this study**

| Strain | Genotype                                                                                                    | Injected plasmid |
|--------|-------------------------------------------------------------------------------------------------------------|------------------|
| UD177  | <i>unc-84(n369); ycls13[unc-84(Δ556–861) sur-5::GFP]</i>                                                    | pSL568           |
| UD305  | <i>unc-84(n369); ycEx188[unc-84(Δ895–919) sur-5::GFP]</i>                                                   | pSL590           |
| UD343  | <i>unc-84(n369); ycEx164[unc-84(Δ783–919) sur-5::GFP]</i>                                                   | pSL487           |
| UD380  | <i>unc-84(n369); ycEx178[unc-84(Δ861–919) sur-5::GFP]</i>                                                   | pSL491           |
| UD389  | <i>unc-83(e1408); unc-84(n369); ycEx215[UNC-83/hNesprin-4 UNC-84/hSUN1 p<sub>odr1</sub>::GFP]</i>           | pSL549/pSL567    |
| UD420  | <i>unc-84(n369); ycEx226[unc-84(Δ861–894) sur-5::GFP]</i>                                                   | pSL650           |
| UD421  | <i>unc-84(n369); ycEx227[unc-84(Δ910–914) sur-5::GFP]</i>                                                   | pSL658           |
| UD422  | <i>unc-84(n369); ycEx228[unc-84(Δ900–904) sur-5::GFP]</i>                                                   | pSL657           |
| UD423  | <i>unc-84(n369); ycEx226[unc-84(Δ861–894) sur-5::GFP]</i>                                                   | pSL650           |
| UD424  | <i>unc-84(n369); ycEx226[unc-84(Δ861–894) sur-5::GFP]</i>                                                   | pSL650           |
| UD427  | <i>unc-84(n369); ycEx230[unc-84(Δ915–919) sur-5::GFP]</i>                                                   | pSL668           |
| UD446  | <i>unc-84(n369); ycEx236[unc-84(Δ895–899) sur-5::GFP]</i>                                                   | pSL654           |
| UD459  | <i>unc-84(n369); ycEx240[unc-84(Δ905–909) sur-5::GFP]</i>                                                   | pSL655           |
| UD460  | <i>unc-84(n369); ycEx241[unc-84(Δ915–919) sur-5::GFP]</i>                                                   | pSL656           |
| UD461  | <i>unc-84(n369); ycEx241[unc-84(Δ915–919) sur-5::GFP]</i>                                                   | pSL656           |
| UD462  | <i>unc-84(n369); ycEx242[unc-84(Δ783–861) sur-5::GFP]</i>                                                   | pSL489           |
| UD464  | <i>unc-83(e1408); unc-84(n369); ycEx243[UNC-83/hNesprin-4 UNC-84/hSUN1(Δ616–620) p<sub>odr1</sub>::GFP]</i> | pSL567/pSL577    |

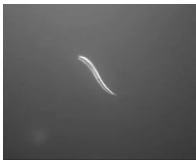

Video 1. **Wild-type L1 larva locomotion.** A representative video from Fig. 2 G is shown. Wild-type larvae move with smooth, sinusoidal motions. Captured and shown at a frame rate of 16.2 fps for 30 s.

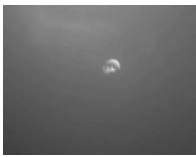

Video 2. ***unc-84(n369)* L1 larva locomotion.** A representative video from Fig. 2 H is shown. *unc-84(n369)* larvae lack the regular motion of the wild type and often twitch and coil. Captured and shown at a frame rate of 16.2 fps for 30 s.
